# Supplementary material
Source: Springer Nature journal article supplement (https://www.springermedizin.de/resource/supplementary/12876_2014_1170_MOESM5_ESM.pdf/9438232)

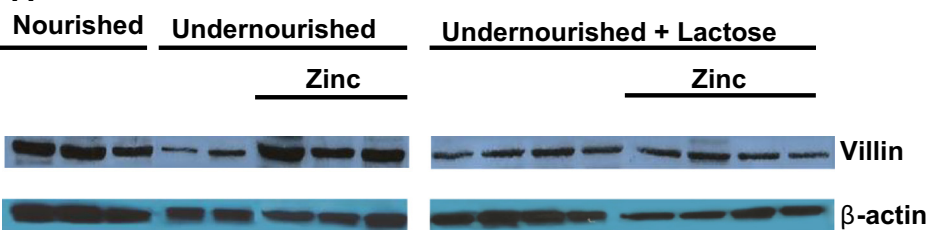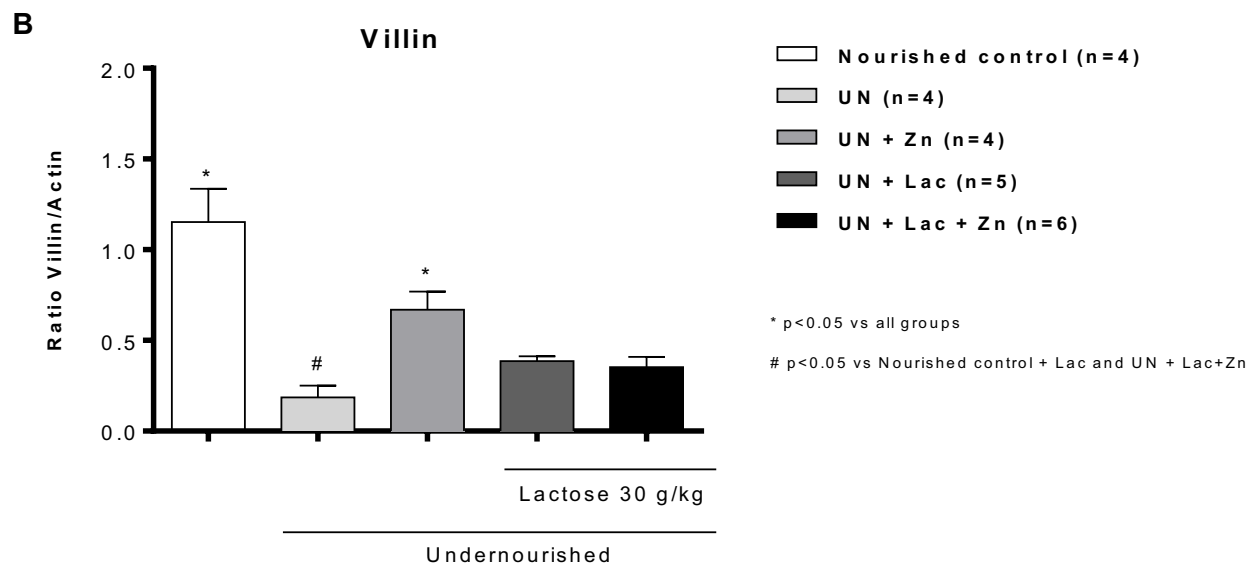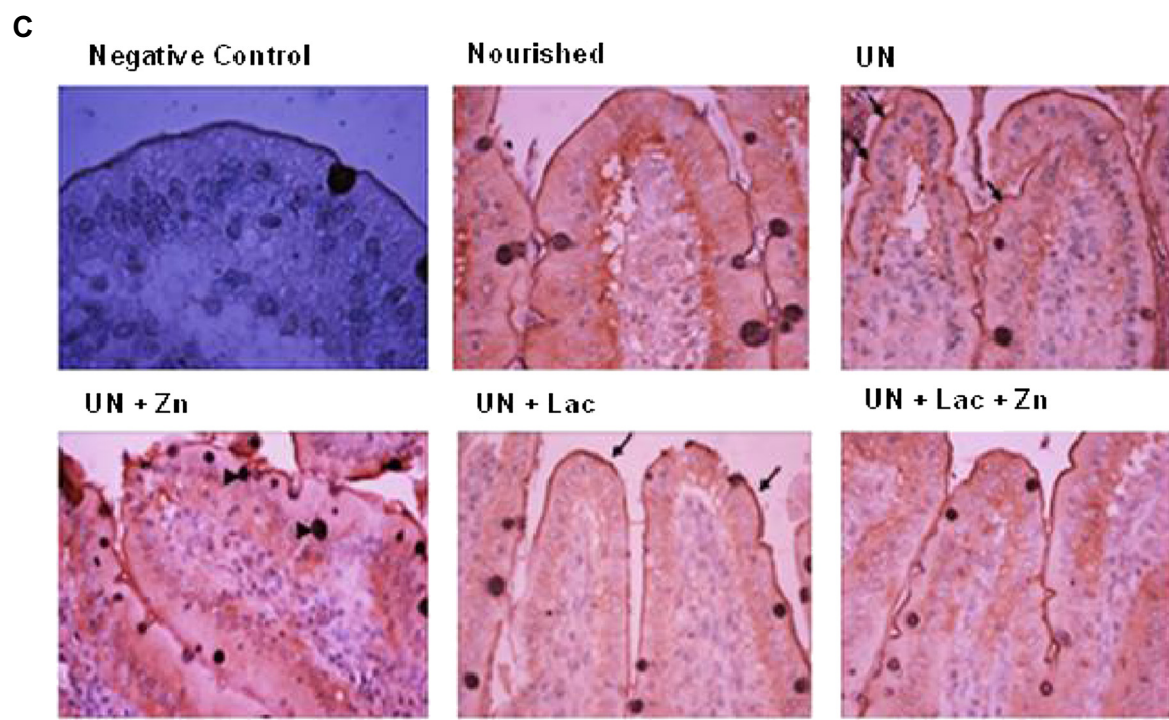

Supplement: MOESM5 [file 9438232]
